# Supplementary material for: Modeling, complexity and finite-time modified adaptive control of a novel electromagnetic energy harvester
Source: Research Square preprint supplement (doi:10.21203/rs.3.rs-7698754/v1), 2025-10-16
Supplement: Supplementary file 1 [file 5609a7d05a9c2a3266510d86.docx]

Highlights

►A novel stacked electromagnetic energy harvester with negative stiffness is designed and modeled.

► complexity is validated as an efficient metric for analyzing nonlinear harvester dynamics.

► Adaptive ISMC strategy which achieves high-energy orbit transition within one second is proposed.

► A 0.14 J control cost is recovered in 57.6 seconds, ensuring continuous net energy profit.
