# Supplementary material for: Modeling, complexity and finite-time modified adaptive control of a novel electromagnetic energy harvester
Source: Research Square preprint supplement (doi:10.21203/rs.3.rs-7698754/v1), 2025-10-16
Supplement: Supplementary file 1 [file d14a16a1e381990a7be28559.pdf]

# Modeling, complexity and finite-time modified adaptive control of a novel electromagnetic energy harvester

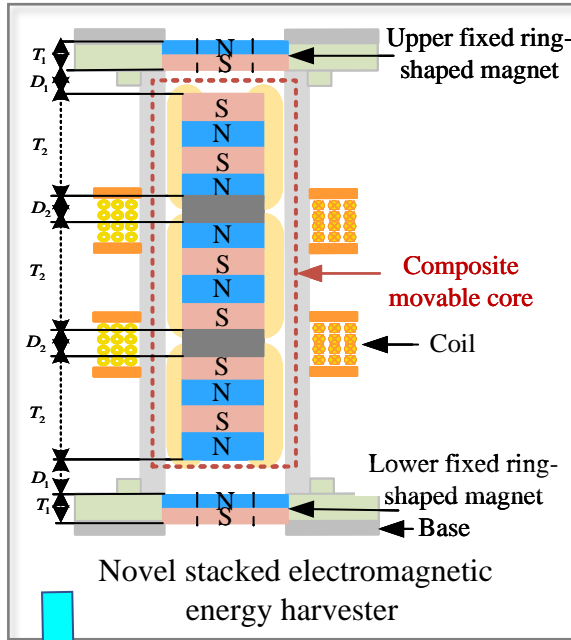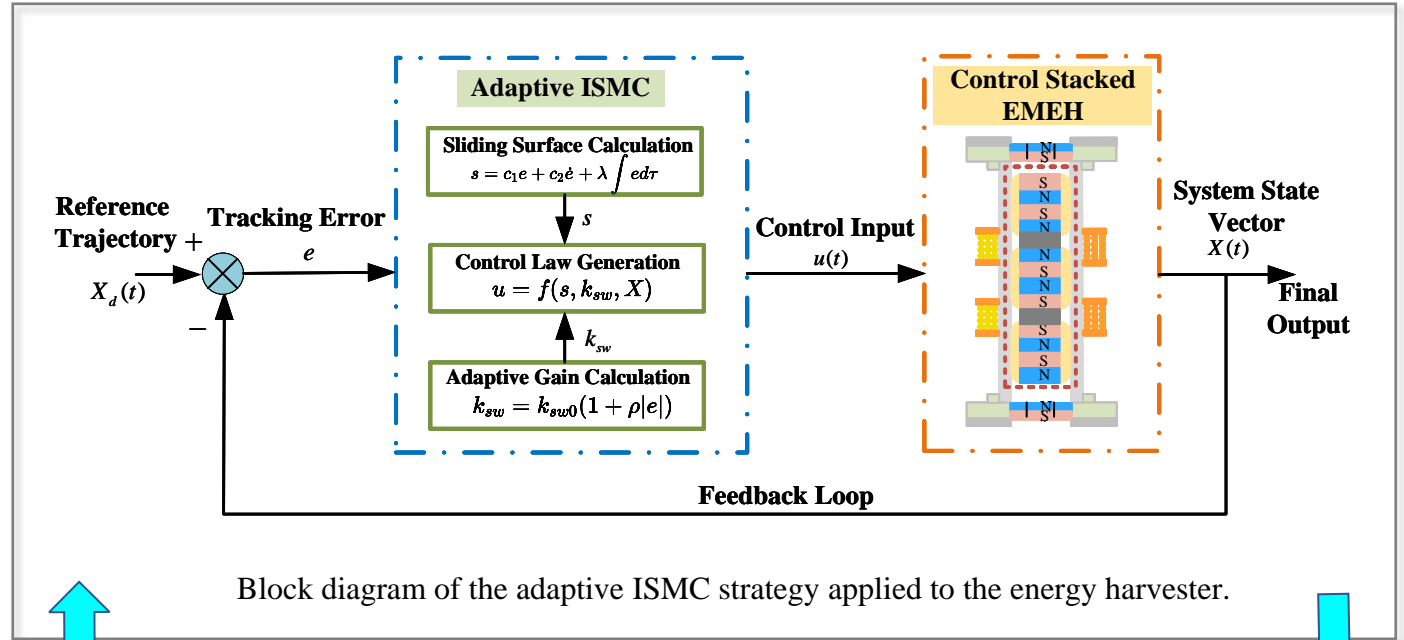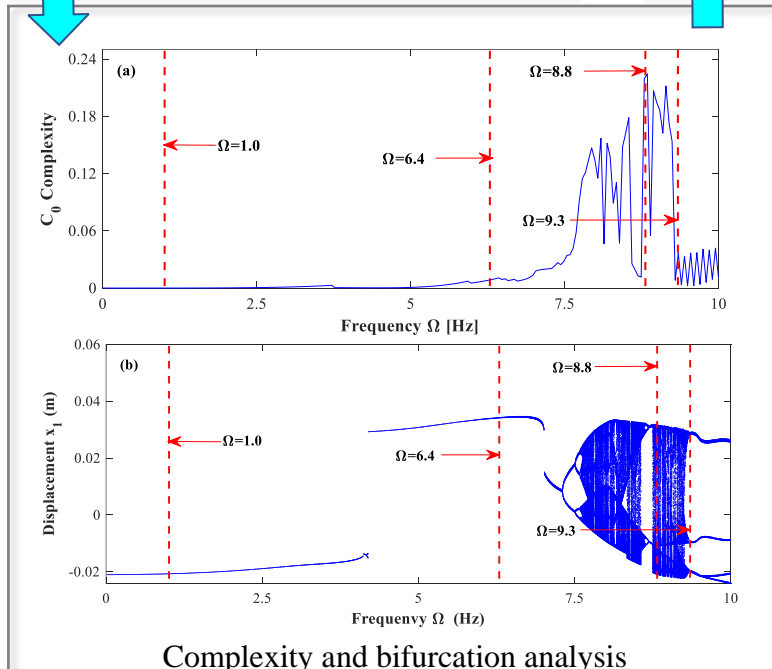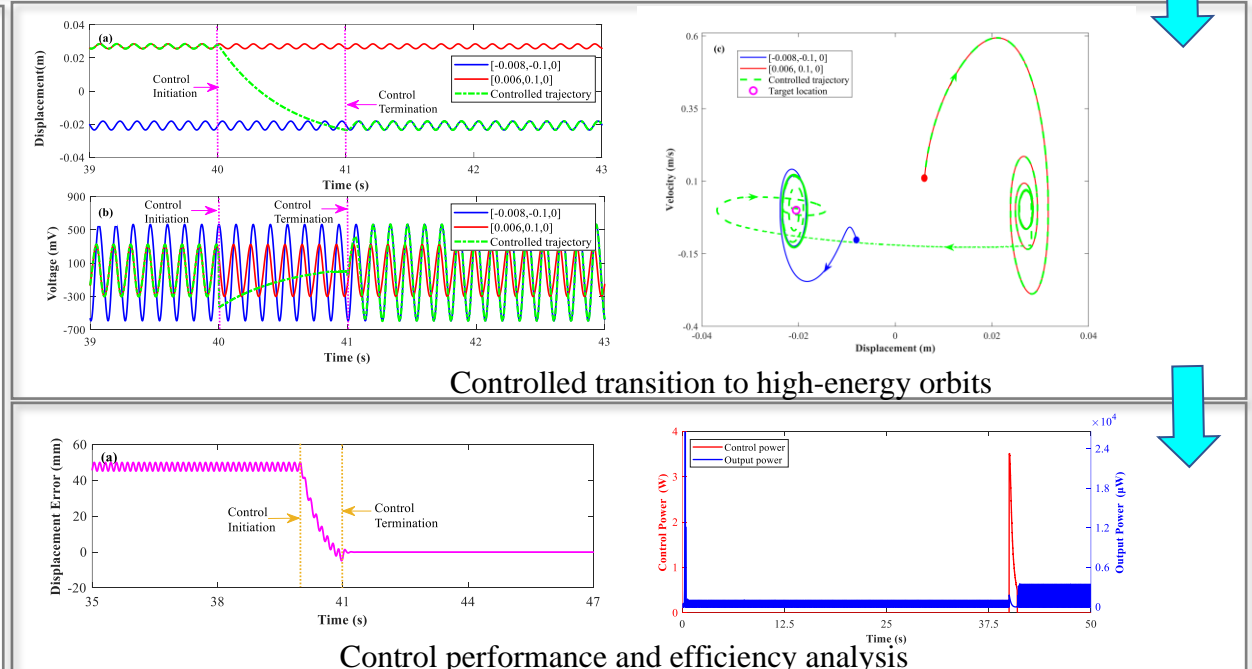

**Conclusion:** This study presents an adaptive control that rapidly steers the harvester from a low-energy attractor to a high-energy orbit. A brief one-second input achieves a sustained power enhancement, proving the method's superior efficiency.
